# Supplementary material for: Carbapenem-resistant Klebsiella pneumoniae capsular types, antibiotic resistance and virulence factors in China: a longitudinal, multi-centre study
Source: PubMed Central journal article supplement (PMC10914598; doi:10.1038/s41564-024-01612-1), 2024-02-29

Extended Figure 9C

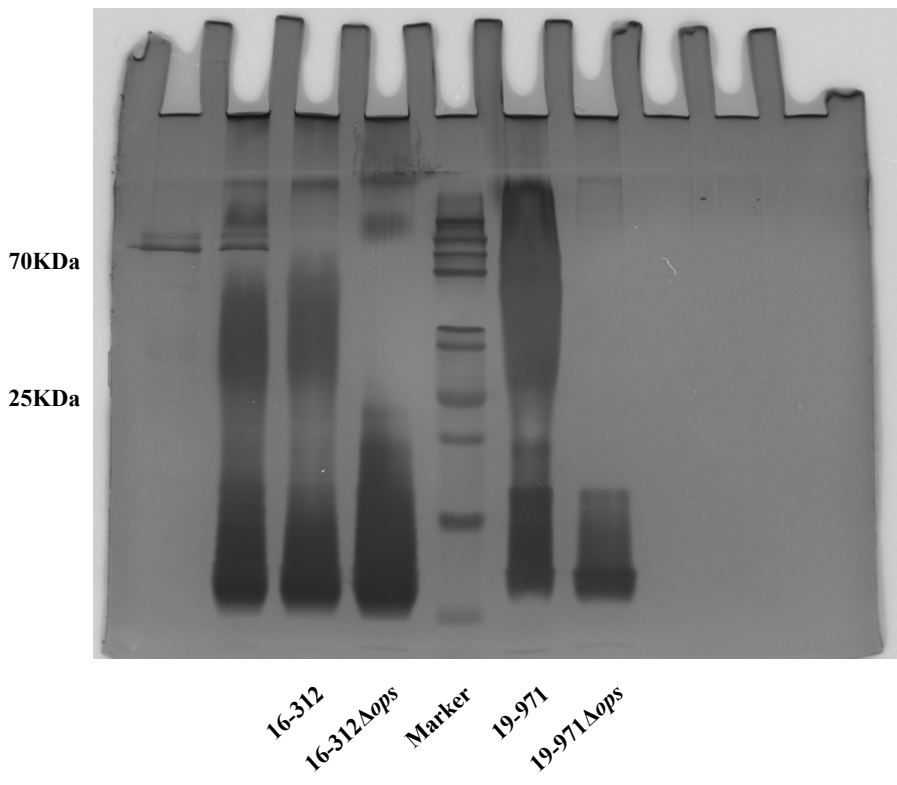

Extended Figure 9C

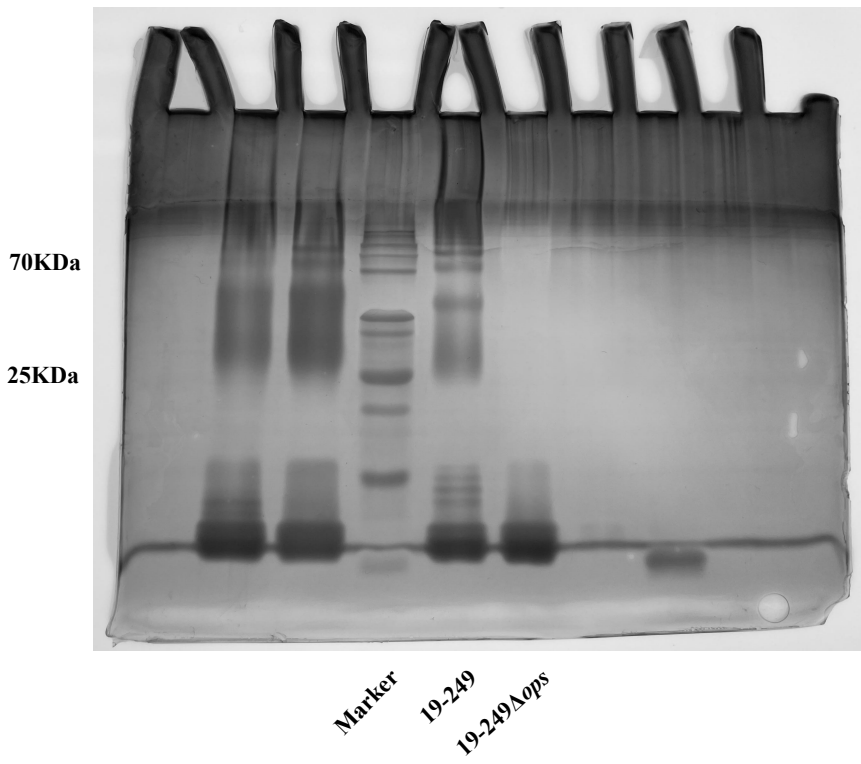

Extended Figure 9C

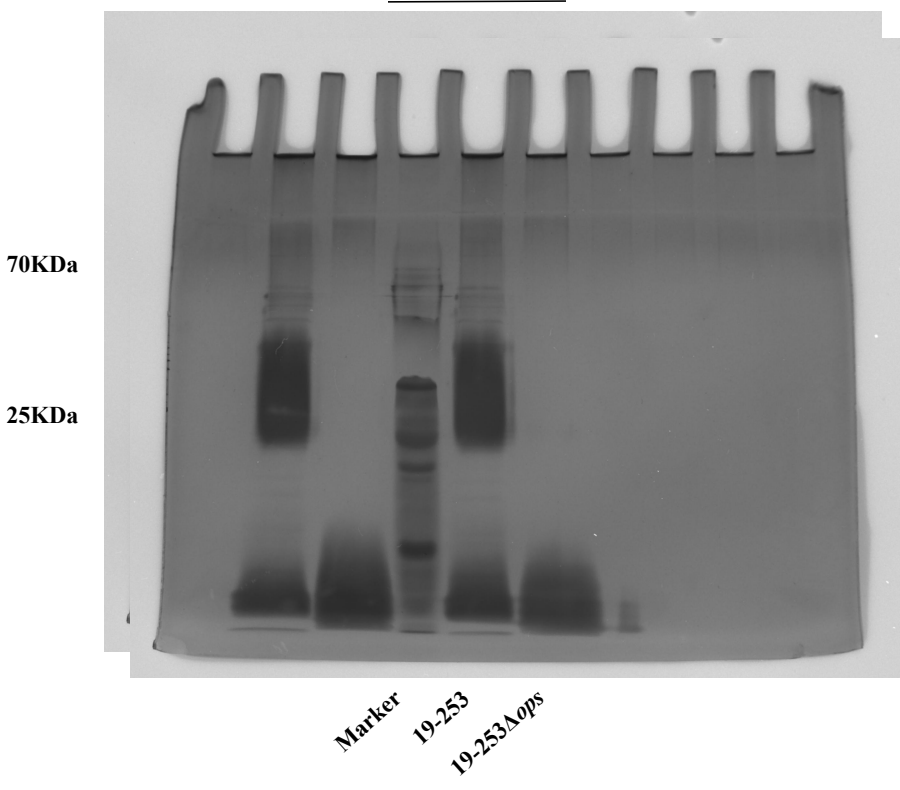

Extended Figure 9D

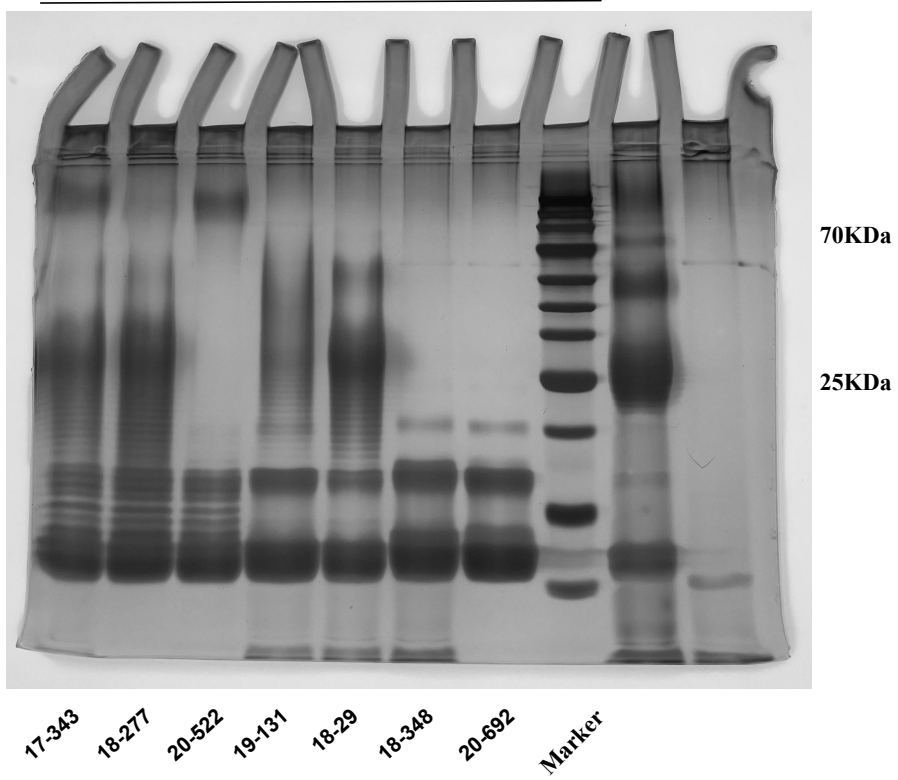

Extended Figure 9D

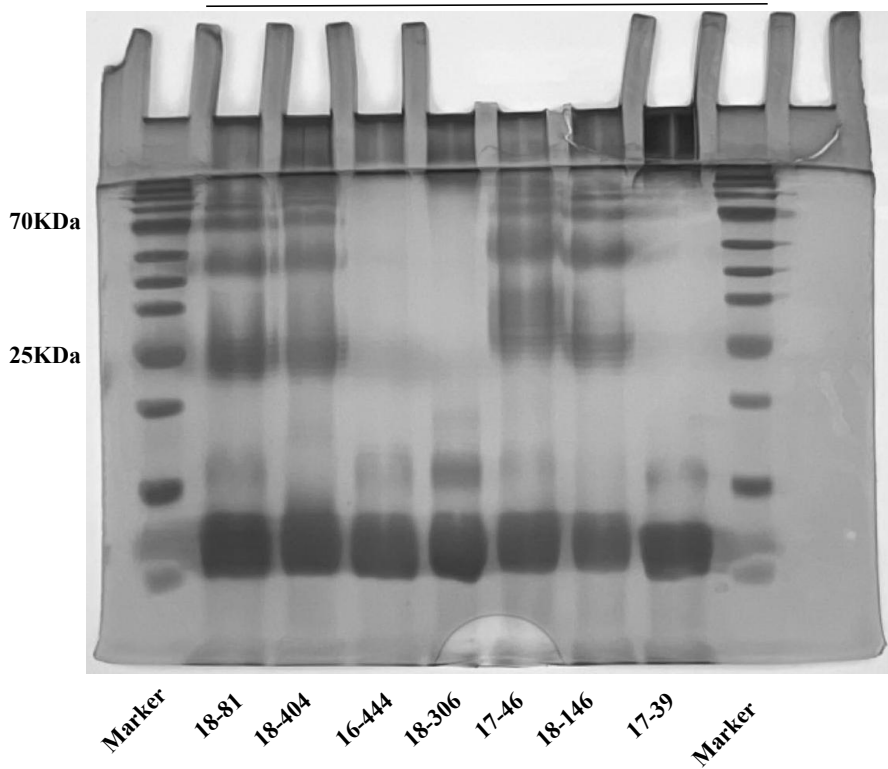

Extended Figure 9E

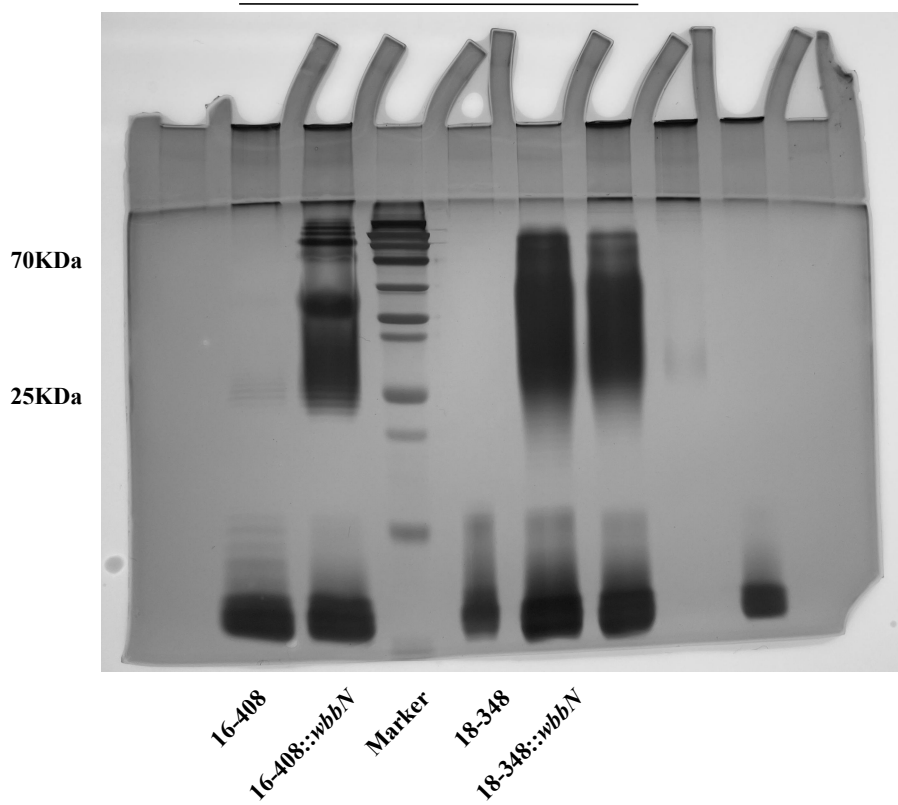

Supplement: 41564_2024_1612_MOESM14_ESM.pdf [file 41564_2024_1612_MOESM14_ESM.pdf]
